# Supplementary material for: Enhanced Identification of Novel Potential Variants for Appendicular Lean Mass by Leveraging Pleiotropy With Bone Mineral Density
Source: PubMed Central journal article supplement (PMC8056257; doi:10.3389/fimmu.2021.643894), 2021-04-06

**Supplementary Figure 1** Manhattan plot of conjunction  $-\log_{10}$  ccFDR values for potential pleiotropic SNPs. The red line marking the conditional  $-\log_{10}$  ccFDR value of 1.3 corresponds to  $\text{ccFDR} < 0.05$ . The figure represents genomic locations of potential pleiotropic SNPs associated with both ALM and BMD. Details of the potential pleiotropic SNPs are listed in Supplementary Table 1.

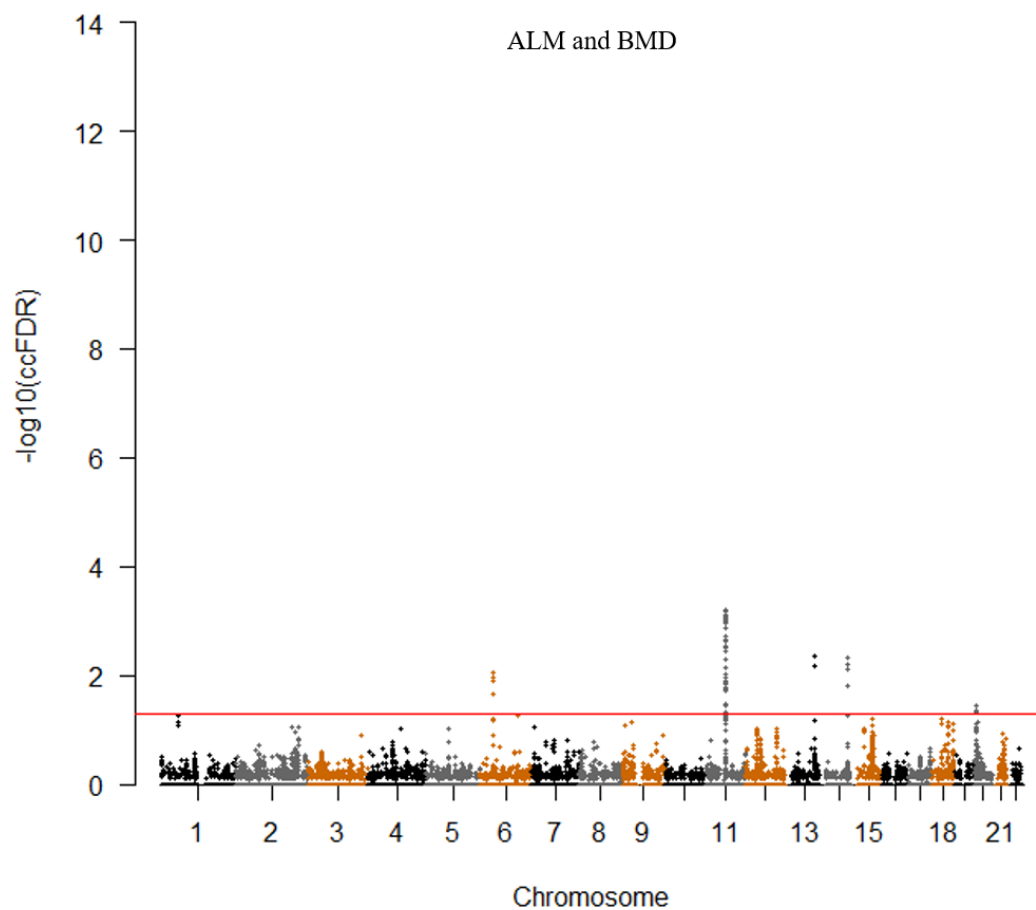

Supplement: Image_1.pdf [file Image_1.pdf]
