# Supplementary material for: Enhanced Identification of Novel Potential Variants for Appendicular Lean Mass by Leveraging Pleiotropy With Bone Mineral Density
Source: PubMed Central journal article supplement (PMC8056257; doi:10.3389/fimmu.2021.643894), 2021-04-06

**Supplementary Figure 2** Manhattan plot of conditional  $-\log_{10}$  cFDR values for ALM given BMD (ALM|BMD). The red line marking the conditional  $-\log_{10}$  cFDR value of 1.3 corresponds to  $\text{cFDR} < 0.05$ . The figure presents the chromosomal locations of cFDR-significant SNPs potentially associated with ALM.

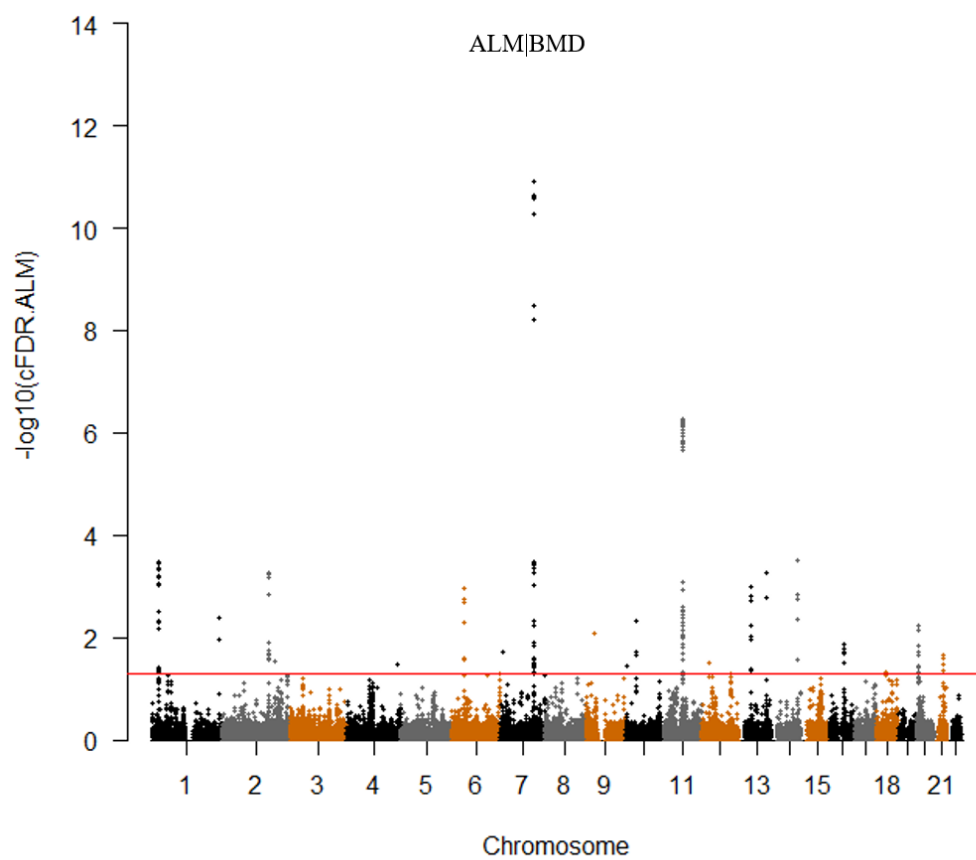

Supplement: Image_2.pdf [file Image_2.pdf]
